# Supplementary material for: MicroRNA-34c-3p is an early predictive biomarker for doxorubicin-induced glomerular injury progression in male Sprague-Dawley rats
Source: Royal Society of Chemistry journal article supplement (doi:10.1039/c4tx00051j), 2014-01-01
Supplement: c4tx00051j1.pdf [file c4tx00051j1.pdf]

Supplemental Figure 1:

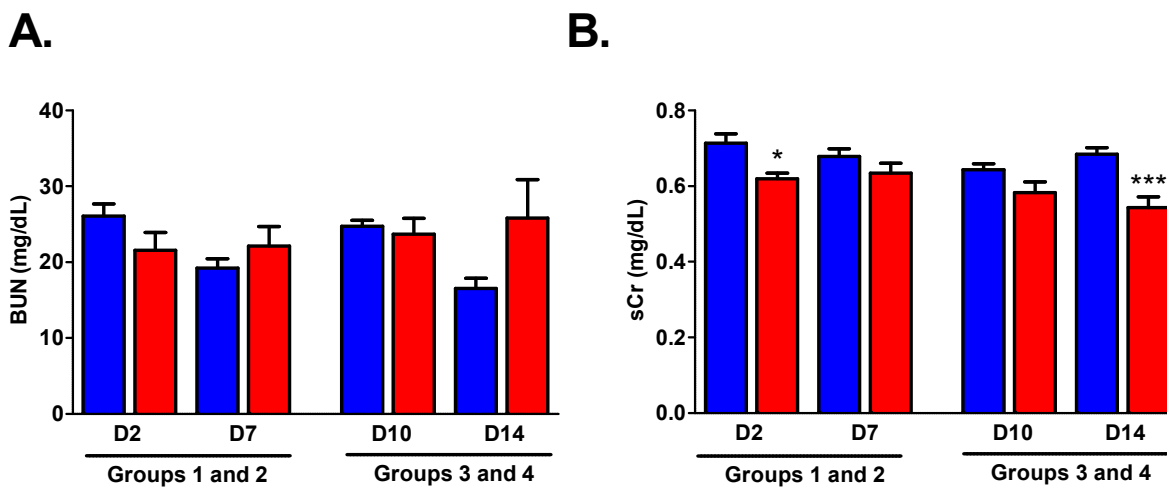

**Supplemental Figure S1:** Blood urea nitrogen (BUN; A) and serum creatinine (sCr, B) concentrations were measured in serum obtained from DOX-treated (red) and Vehicle-treated (blue) rats. Data represents the mean concentration  $\pm$  SEM. Significance is \* $p < 0.05$  and \*\*\* $p < 0.001$  (compared to Vehicle controls).

## Supplemental Figure 2

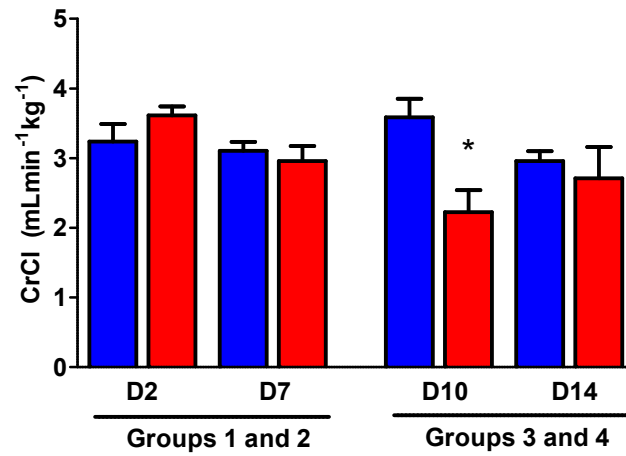

**Supplemental Figure S2:** Creatinine clearance (CrCl) was determined for Vehicle- (blue) and DOX-treated (red) rodents on D2, D7, D10, and D14. Bars represent the mean concentration  $\pm$  SEM. Significance is \* $p < 0.05$  (compared to Vehicle).

**Supplemental Figure 3:**

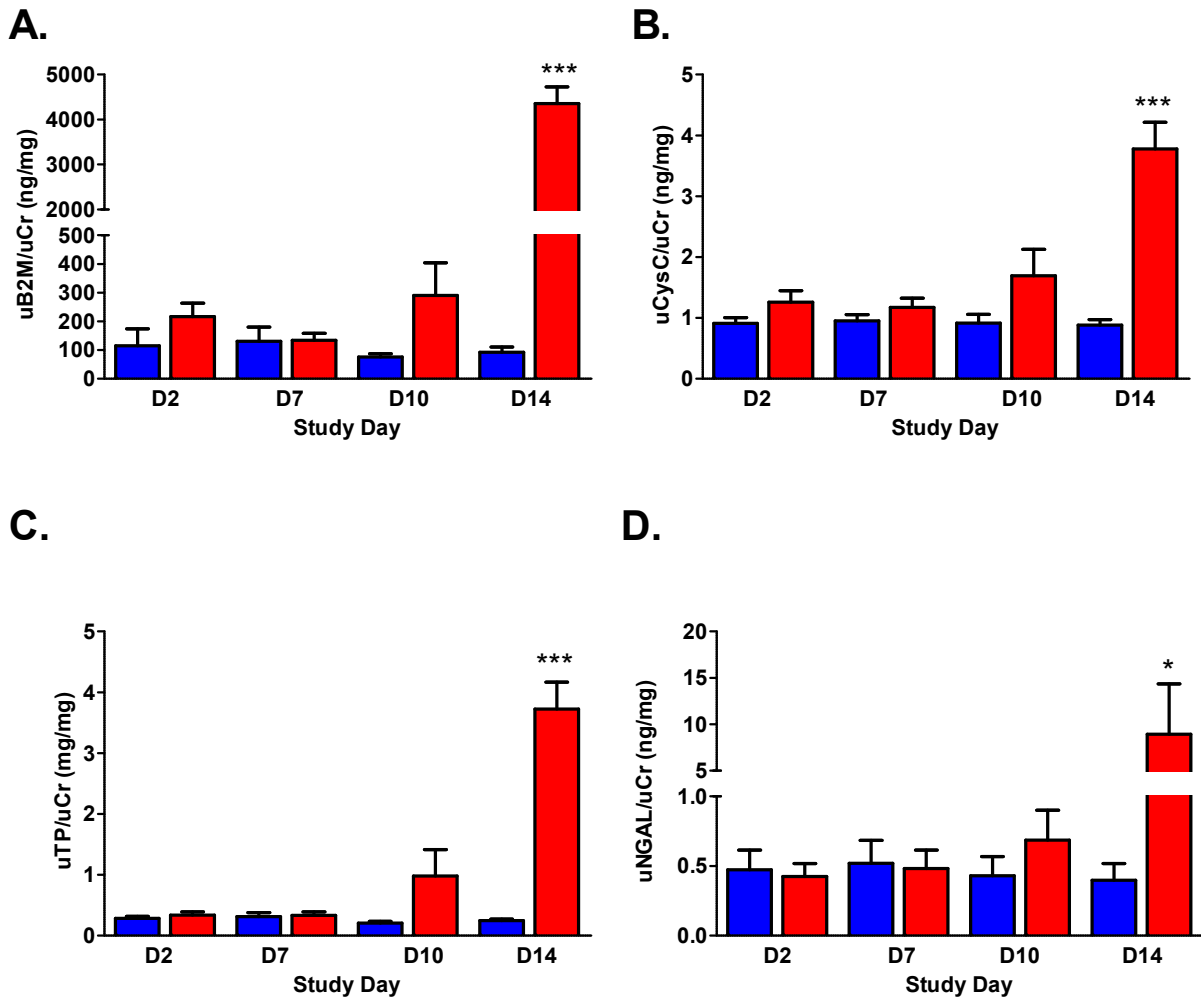

**Supplemental Figure S3:** Urinary B2M (uB2M; A), Cystatin C (uCysC; B), TP (uTP; C), and NGAL (uNGAL; D) concentrations were measured in urine obtained from Group 4 (DOX; red) and Group 3 (Vehicle; blue) rats. Bars represent the mean concentration  $\pm$  SEM. Significance is \* $p < 0.05$  and \*\*\* $p < 0.001$  by two way ANOVA analysis and Bonferroni multiple test correction (compared to Vehicle)

## Supplemental Figure 4

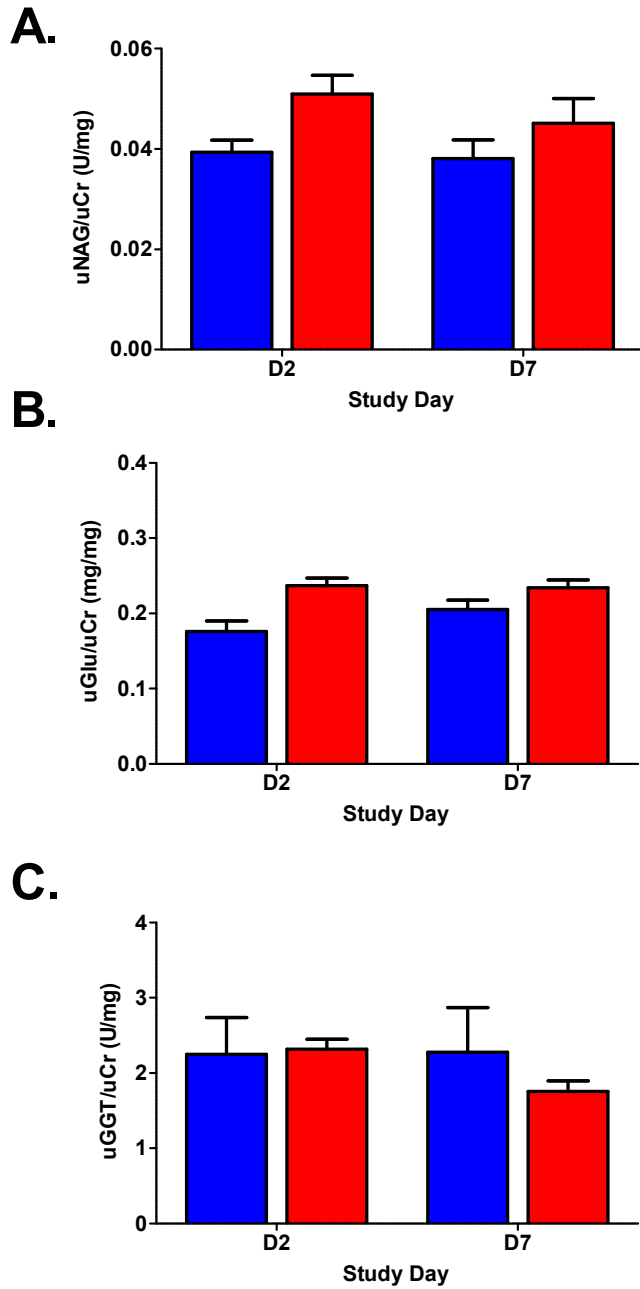

**Supplemental Figure S4:** Urinary NAG (uNAG; A), glucose (uGlu; B), and GGT (uGGT; C) concentrations were measured in urine obtained from DOX-treated (red) and Vehicle-treated (blue) rats. Bars represent the mean concentration  $\pm$  SEM.

Supplemental Figure 5

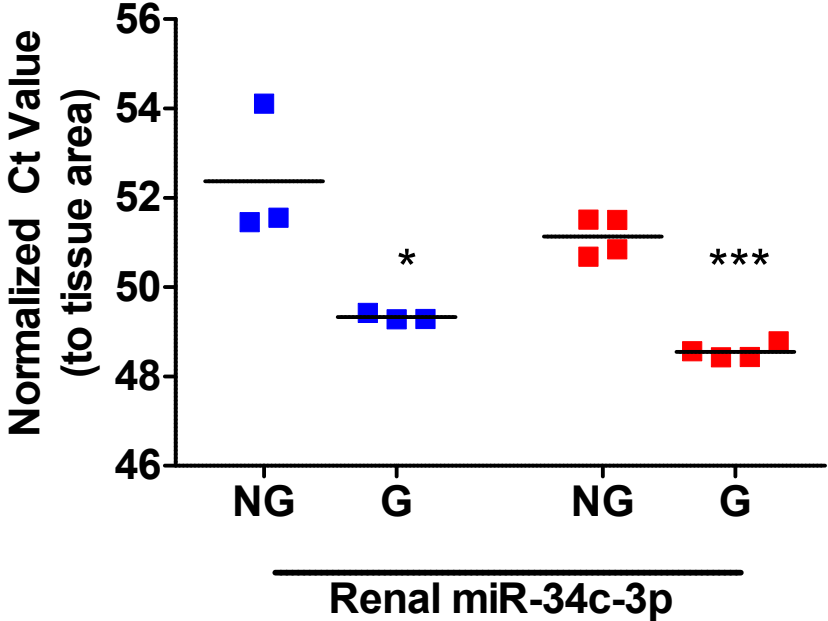

**Supplemental Figure S5:** Relative quantification of miR-34c-3p was determined in glomeruli (G), as well as adjacent nonglomerular (NG) renal tissue samples from a subset of Vehicle- (blue) and D14 DOX-treated (red). Line represents mean normalized Ct value. Significance is \* $p < 0.05$  and \*\*\* $p < 0.001$  (G compared to NG)

## Supplemental Table 1

### Urinary Protein Biomarker Data For Groups 1 and 2 Rats

| Urinary Biomarker        | Study Day | Vehicle-treated (Group 1) | DOX-treated (Group 2) |
|--------------------------|-----------|---------------------------|-----------------------|
| <b>uOPN</b><br>(ng/mg)   | D2        | 1.087 ± 0.16              | 1.157 ± 0.1           |
|                          | D7        | 0.916 ± 0.22              | 1.047 ± 0.53          |
| <b>uALB</b><br>(ng/mg)   | D2        | 200.8 ± 38                | 236.8 ± 55.68         |
|                          | D7        | 242.5 ± 31.67             | 7681 ± 3775*          |
| <b>uKIM-1</b><br>(ng/mg) | D2        | 0.337 ± 0.059             | 0.227 ± 0.06          |
|                          | D7        | 0.3 ± 0.07                | 0.241 ± 0.07          |
| <b>uB2M</b><br>(ng/mg)   | D2        | 67.47 ± 25.56             | 87.93 ± 25.69         |
|                          | D7        | 80.26 ± 19.48             | 71.07 ± 18.81         |
| <b>uCysC</b><br>(ng/mg)  | D2        | 0.847 ± 0.097             | 0.876 ± 0.107         |
|                          | D7        | 0.927 ± 0.083             | 0.874 ± 0.104         |
| <b>uTP</b><br>(mg/mg)    | D2        | 0.28 ± 0.03               | 0.212 ± 0.021         |
|                          | D7        | 0.314 ± 0.027             | 0.308 ± 0.036         |
| <b>uNGAL</b><br>(ng/mg)  | D2        | 0.43 ± 0.105              | 0.537 ± 0.061         |
|                          | D7        | 0.408 ± 0.092             | 0.43 ± 0.064          |
| <b>uNAG</b><br>(U/mg)    | D2        | 0.035 ± 0.002             | 0.037 ± 0.003         |
|                          | D7        | 0.038 ± 0.002             | 0.046 ± 0.005         |
| <b>uGLU</b><br>(mg/mg)   | D2        | 0.173 ± 0.028             | 0.174 ± 0.028         |
|                          | D7        | 0.194 ± 0.01              | 0.2 ± 0.015           |
| <b>uGGT</b><br>(U/mg)    | D2        | 1.318 ± 0.221             | 1.647 ± 0.279         |
|                          | D7        | 1.61 ± 0.171              | 2.381 ± 0.305         |

Data represents protein concentration mean ± SEM

\*Significance is p<0.05

**Supplemental Table 2**

| <b>DOX Related Alterations in miRNA Species in Male Sprague-Dawley Rats<br/>(Compared to Vehicle)</b> |                              |           |            |            |
|-------------------------------------------------------------------------------------------------------|------------------------------|-----------|------------|------------|
| <b>Day of Urinary miRNA Release</b>                                                                   | <b>D2</b>                    | <b>D7</b> | <b>D10</b> | <b>D14</b> |
| <b># of Increased miRNA</b>                                                                           | 5                            | 12        | 33         | 133        |
| <b># of Decreased miRNA</b>                                                                           | 24                           | 5         | 3          | 4          |
| <b>Candidate Urinary miRNA Biomarkers</b>                                                             | 1 Common species: miR-34c-3p |           |            |            |
